# Supplementary material
Source: PubMed Central journal article supplement (PMC5118965)
Supplement: Supp_Table1.pdf [file Supp_Table1.pdf]

## Supplementary Data

**Supplementary Table I. Multivariate Logistic Regression of Mutually Adjusted Early Life Risk Factors on Odds of Overweight at 5 Years From the ALSPAC Children in Focus Cohort**

| Risk factors                                             | Adjusted OR | 95% CI |       |
|----------------------------------------------------------|-------------|--------|-------|
|                                                          |             | LCL    | UCL   |
| Sex                                                      |             |        |       |
| Male                                                     | Ref         | —      | —     |
| Female                                                   | 2.21        | 1.14   | 4.30  |
| Infant birth weight (quintiles) (kg)                     |             |        |       |
| <2.93                                                    | Ref         | —      | —     |
| 2.93–<3.24                                               | 2.18        | 0.37   | 12.99 |
| 3.24–<3.49                                               | 3.70        | 0.71   | 19.22 |
| 3.49–<3.81                                               | 7.51        | 1.48   | 38.02 |
| ≥3.81 kg                                                 | 5.22        | 0.97   | 28.14 |
| Infant rapid weight gain (0–4 months)                    |             |        |       |
| No (≤0.67 SD ΔWFA z-score)                               | Ref         | —      | —     |
| Yes (>0.67 SD ΔWFA z-score)                              | 5.36        | 2.33   | 12.14 |
| Maternal prepregnancy weight status (kg/m <sup>2</sup> ) |             |        |       |
| <18.5                                                    | 0.84        | 0.21   | 3.28  |
| 18.5–<25                                                 | Ref         | —      | —     |
| 25–<30                                                   | 1.88        | 0.84   | 4.18  |
| ≥30                                                      | 2.14        | 0.68   | 6.75  |
| Paternal BMI (kg/m <sup>2</sup> )                        |             |        |       |
| <18.5                                                    | 6.51        | 1.04   | 40.53 |
| 18.5–<25                                                 | Ref         | —      | —     |
| 25–<30                                                   | 2.87        | 1.43   | 5.77  |
| ≥30                                                      | 2.10        | 0.67   | 6.49  |
| Maternal smoking in pregnancy                            |             |        |       |
| No                                                       | Ref         | —      | —     |
| Yes                                                      | 3.36        | 1.40   | 8.04  |
| Ever breastfed infant in first year                      |             |        |       |
| No                                                       | 1.22        | 0.52   | 2.89  |
| Yes                                                      | Ref         | —      | —     |

ALSPAC, Avon Longitudinal Study of Parents and Children; SD, standard deviation; WFA, weight-for-age; OR, odds ratio; CI, confidence interval; LCL, lower confidence limit; UCL, upper confidence limit.
